# Supplementary material for: Evaluating the Efficacy of ChatGPT in Navigating the Spanish Medical Residency Entrance Examination (MIR): Promising Horizons for AI in Clinical Medicine
Source: Clin Pract. 2023 Nov 20;13(6):1460–87. doi: 10.3390/clinpract13060130 (PMC10660543; doi:10.3390/clinpract13060130)
Supplement: Supplementary file 1 [file clinpract-13-00130-s001.zip]

Archive with 4 entries (4 files):
- Table S1  English Translation of the MIR Examination.pdf
- Table S2 Answer to MIR examination questions.pdf
- Table S3  Questions failed by GPT4 indicating the wrong answer and the classification of the Error.pdf
- Table S4 Images and English translation of the questions with image.pdf
